# Supplementary material
Source: Springer Nature journal article supplement (https://www.springermedizin.de/resource/supplementary/13027_2011_300_MOESM1_ESM.pdf/25656816)

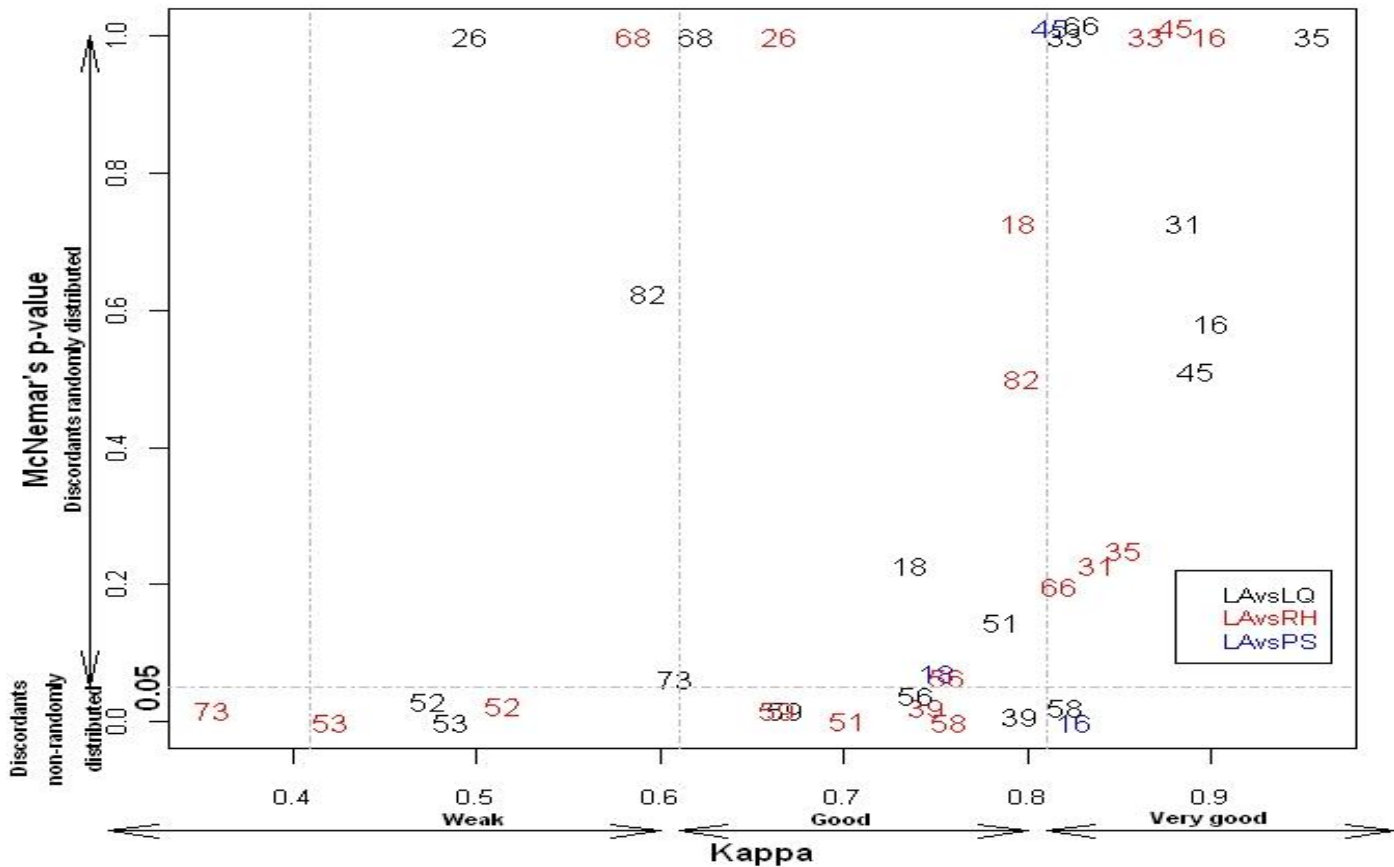

Supplement: MOESM1 [file 25656816]
